# Supplementary material for: A transcription and translation-coupled DNA replication system using rolling-circle replication
Source: PubMed Central journal article supplement (PMC4445062; doi:10.1038/srep10404), 2015-05-27
Supplement: srep10404-s1.pdf [file srep10404-s1.pdf]

## Supplementary Information

### A transcription and translation-coupled DNA replication system using rolling-circle replication

Yoshihiro Sakatani<sup>[a]</sup>, Norikazu Ichihashi<sup>[a, b]</sup>, Yasuaki Kazuta<sup>[b]</sup>, Tetsuya Yomo<sup>\*[a, b, c, d]</sup>

[a] *Department of Bioinformatics Engineering, Graduate School of Information Science and Technology, Osaka University, 1-5 Yamadaoka, Suita, Osaka, 565-0871, Japan*

[b] Exploratory Research for Advanced Technology, Japan Science and Technology Agency. 1-5 Yamadaoka, Suita, Osaka, 565-0871, Japan

[c] Graduate School of Frontier Biosciences, Osaka University University 1-5 Yamadaoka, Suita, Osaka, 565-0871, Japan

[d] Earth-Life Science Institute, Tokyo Institute of Technology, Meguro, Tokyo, 152-8550, Japan

\*yomo@ist.osaka-u.ac.jp

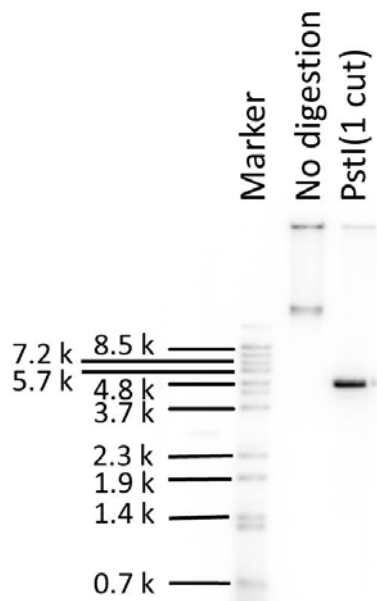

**Figure S1 Digestion of the replication product in standard replication buffer.**

The DNA replication product produced by purified phi29 DNA polymerase in the buffer system shown in lane 4 of Figure 2 was digested with PstI, which cleaved the template plasmid (4.7 kbp) at one location.

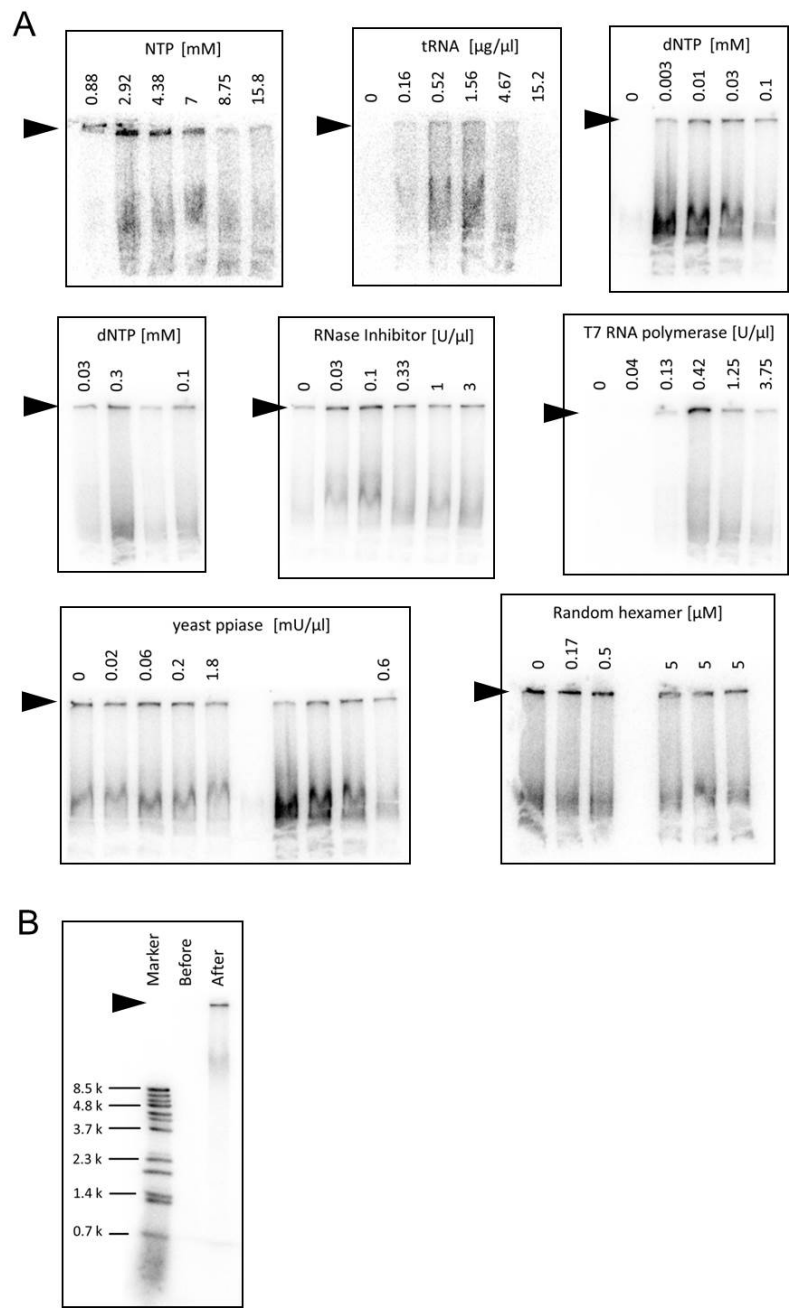

**Figure S2 Whole gel images of Figure 3.**

(A) Whole gel images of Figure 3A. (B) One of the whole gel images of Figure 3B. The quantified bands are indicated (arrowheads).

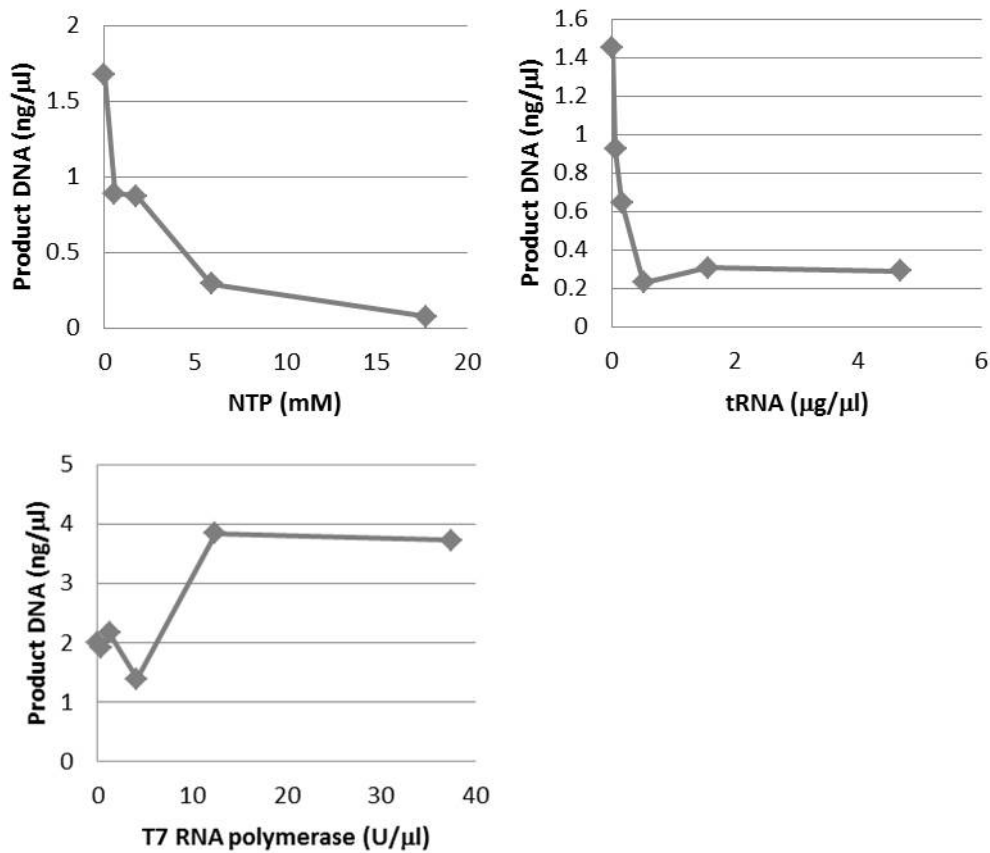

**Figure S3 Effects of certain components on DNA replication**

Circular DNA (1 ng/μl) was mixed with purified phi29 DNA polymerase (1 U/μl) in standard replication buffer and incubated at 30 °C for 12 h in the presence of NTPs, tRNA, or T7 RNA polymerase at the indicated concentrations. The replication products were measured as described in the Methods. NTPs included each nucleotide triphosphate (ATP:GTP:CTP:UTP = 3.75:2.5:1.25:1.25) and the same molarity of magnesium acetate. Original gel images are shown in Figure S4.

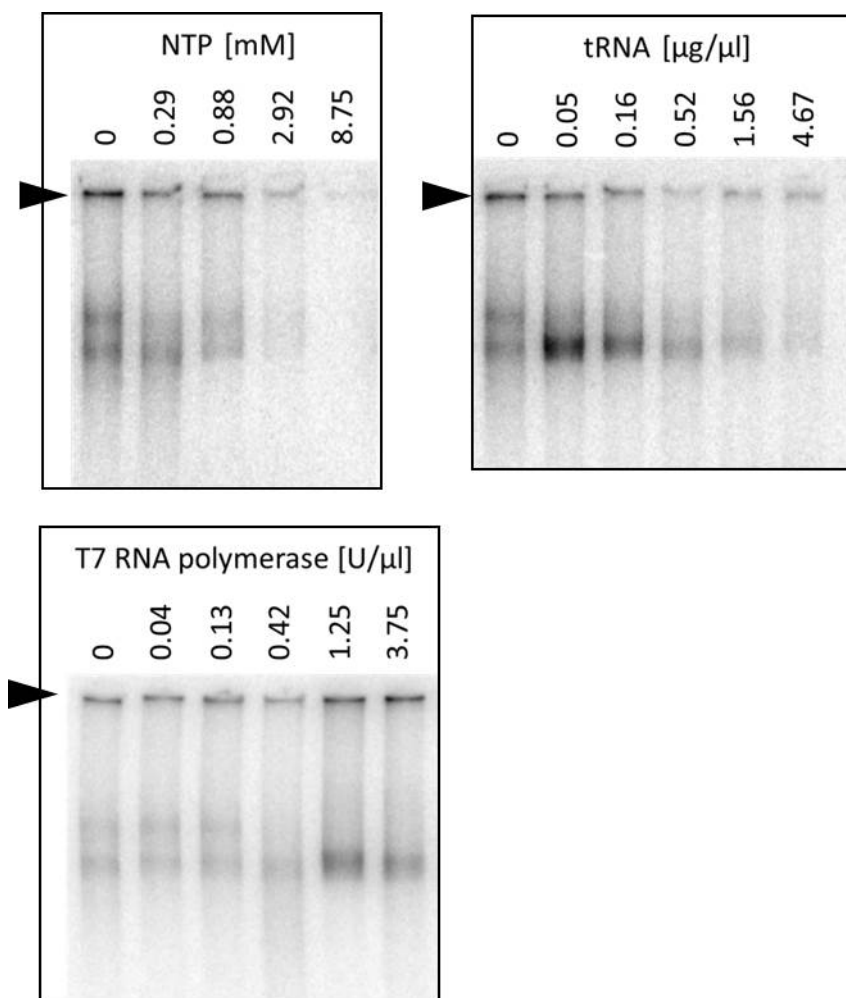

**Figure S4** Whole gel images of **Figure S3**

The quantified bands are indicated (arrowheads).

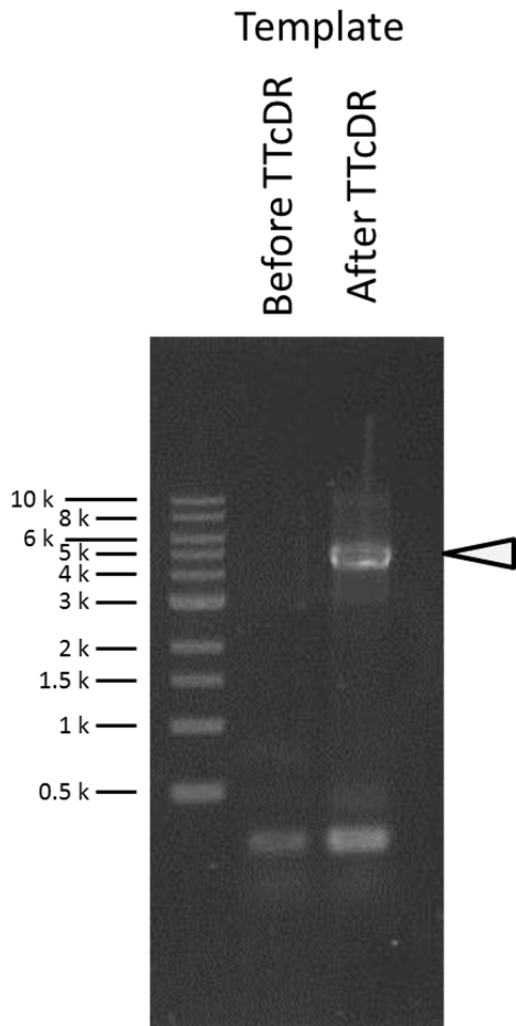

**Figure S5** Amplification of the plasmid sequence from the TTcDR product by PCR.

We performed PCR using the TTcDR product after a 12 h incubation as a template and specific primers for the original plasmid (GTTATCCACAGAATCAGGGGATAAC and CGTATTACCGCCTTTGAGTGAGC). As a control, we also used the TTcDR mixture before incubation as a template. To avoid amplifying from the original plasmid, we treated the TTcDR mixture with *DpnI* (final 0.5U/ $\mu$ l) at 37 °C for 2 h to degrade the template plasmid. If the TTcDR product was a repeat of the original plasmid, a 4.7 kbp DNA fragment (arrowhead) would be amplified by this PCR.

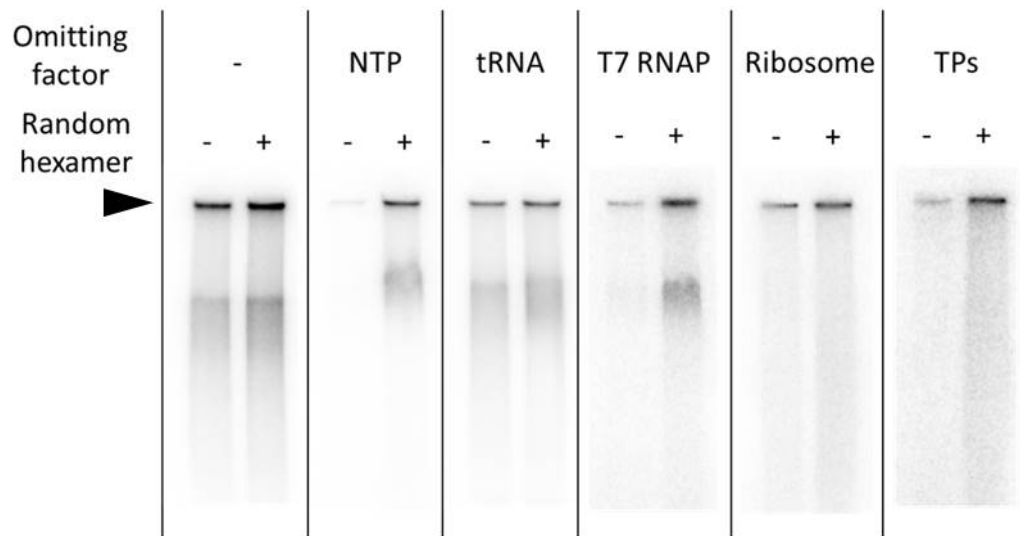

**Figure S6 Whole gel images of Figure 6**

The quantified bands are indicated (arrowheads).
